# Supplementary material for: Lenticular nucleus volume predicts performance in real-time strategy game - cross-sectional and training approach using voxel-based morphometry
Source: bioRxiv or medRxiv preprint supplement (doi:10.1101/2020.07.20.205864), 2020-07-21
Supplement: Supplementary file [file media-1.pdf]

**Table 1. Correlation coefficient (*r*) from Spearman's correlation analyses between ROIs GMW (left, right putamen and pallidum) and Perception Action Cycle latency, Actions Per Minute, Hotkey Selects usage.**

|                | Putamen L                                | Putamen R                         | Pallidum L                               | Pallidum R                              |
|----------------|------------------------------------------|-----------------------------------|------------------------------------------|-----------------------------------------|
| PAC latency Q1 | <b><i>r</i> = -0.58, <i>p</i> = 0.02</b> | <i>r</i> = -0.43, <i>p</i> = 0.10 | <b><i>r</i> = -0.57, <i>p</i> = 0.02</b> | <b><i>r</i> = 0.54, <i>p</i> = 0.03</b> |
| PAC latency Q2 | <i>r</i> = -0.34, <i>p</i> = 0.20        | <i>r</i> = -0.12, <i>p</i> = 0.66 | <i>r</i> = -0.33, <i>p</i> = 0.21        | <i>r</i> = -0.25, <i>p</i> = 0.35       |
| PAC latency Q3 | <i>r</i> = -0.20, <i>p</i> = 0.46        | <i>r</i> = -0.10, <i>p</i> = 0.72 | <i>r</i> = -0.26, <i>p</i> = 0.34        | <i>r</i> = -0.22, <i>p</i> = 0.41       |
| PAC latency Q4 | <i>r</i> = -0.21, <i>p</i> = 0.43        | <i>r</i> = -0.19, <i>p</i> = 0.49 | <i>r</i> = -0.30, <i>p</i> = 0.26        | <i>r</i> = -0.29, <i>p</i> = 0.27       |
|                |                                          |                                   |                                          |                                         |
| APM Q1         | <i>r</i> = 0.22, <i>p</i> = 0.41         | <i>r</i> = 0.12, <i>p</i> = 0.65  | <i>r</i> = 0.03, <i>p</i> = 0.91         | <i>r</i> = -0.04, <i>p</i> = 0.88       |
| APM Q2         | <i>r</i> = 0.16, <i>p</i> = 0.56         | <i>r</i> = -0.02, <i>p</i> = 0.94 | <i>r</i> = -0.03, <i>p</i> = 0.91        | <i>r</i> = -0.06, <i>p</i> = 0.83       |
| APM Q3         | <i>r</i> = 0.23, <i>p</i> = 0.39         | <i>r</i> = 0.09, <i>p</i> = 0.75  | <i>r</i> = 0.06, <i>p</i> = 0.82         | <i>r</i> = -0.03, <i>p</i> = 0.91       |
| APM Q4         | <i>r</i> = 0.25, <i>p</i> = 0.36         | <i>r</i> = 0.09, <i>p</i> = 0.74  | <i>r</i> = 0.10, <i>p</i> = 0.71         | <i>r</i> = 0.06, <i>p</i> = 0.82        |
|                |                                          |                                   |                                          |                                         |
| HS Q1          | <i>r</i> = -0.36, <i>p</i> = 0.18        | <i>r</i> = -0.40, <i>p</i> = 0.13 | <i>r</i> = -0.29, <i>p</i> = 0.28        | <i>r</i> = -0.39, <i>p</i> = 0.13       |
| HS Q2          | <i>r</i> = -0.27, <i>p</i> = 0.31        | <i>r</i> = -0.24, <i>p</i> = 0.38 | <i>r</i> = -0.14, <i>p</i> = 0.59        | <i>r</i> = -0.27, <i>p</i> = 0.32       |
| HS Q3          | <i>r</i> = -0.28, <i>p</i> = 0.28        | <i>r</i> = -0.31, <i>p</i> = 0.25 | <i>r</i> = -0.20, <i>p</i> = 0.45        | <i>r</i> = -0.33, <i>p</i> = 0.21       |
| HS Q4          | <i>r</i> = -0.18, <i>p</i> = 0.51        | <i>r</i> = -0.18, <i>p</i> = 0.51 | <i>r</i> = -0.07, <i>p</i> = 0.79        | <i>r</i> = -0.21, <i>p</i> = 0.44       |

\*Significant results are bolded, uncorrected for multiple comparisons (false discovery rate). PAC - Perception Action Cycle, APM - Action Per Minute, HS - Hotkey Selects, Q - quartile, L - left, R - right
