# Supplementary material for: Lenticular nucleus volume predicts performance in real-time strategy game - cross-sectional and training approach using voxel-based morphometry
Source: bioRxiv or medRxiv preprint supplement (doi:10.1101/2020.07.20.205864), 2020-07-21
Supplement: Supplementary file [file media-2.pdf]

**Table 2. Mean weekly hours of video games played in the last 6 months, by genre.**

Values are mean and SD (SD in parentheses). All variables were compared between groups with two sample t-tests.

| Video game genre                | RTS experts         | NVGPs              | <i>p</i> -value |
|---------------------------------|---------------------|--------------------|-----------------|
| Real-time strategy              | <b>16.06 (9.91)</b> | <b>0.05 (0.15)</b> | <b>0.000</b>    |
| First-person shooter            | 1.02 (2.15)         | 0.27 (0.60)        | 0.07            |
| Platform                        | 0 (0.00)            | 0.06 (0.21)        | 0.10            |
| Fighting                        | 0.16 (0.57)         | 0 (0.00)           | 0.12            |
| Turn-based strategy             | 1 (1.77)            | 0.35 (0.70)        | 0.06            |
| Sports                          | <b>0 (0.00)</b>     | <b>0.65 (1.42)</b> | <b>0.01</b>     |
| Role-play                       | <b>1.60 (2.08)</b>  | <b>0.19 (0.46)</b> | <b>0.01</b>     |
| Racing                          | 0.13 (0.29)         | 0.27 (0.55)        | 0.20            |
| Logic                           | 0.66 (1.32)         | 0.37 (0.66)        | 0.30            |
| Multiplayer online battle arena | <b>1.44 (2.99)</b>  | <b>0.13 (0.39)</b> | <b>0.02</b>     |
| Adventure                       | 0.68 (1.88)         | 0.03 (0.12)        | 0.06            |

\*Significant results are bolded. RTS - real time strategy games, NVGPs – non-video game players

The data presented in table 2 are also a part of our other study (77).
